# Supplementary material for: Extraction of High Value Triterpenic Acids from Eucalyptus globulus Biomass Using Hydrophobic Deep Eutectic Solvents
Source: PubMed Central journal article supplement (PMC6983165; doi:10.3390/molecules25010210), 2020-01-04
Supplement: molecules-25-00210-s001.pdf [file molecules-25-00210-s001.pdf]

## Supplementary Materials

Article

# Extraction of high value triterpenic acids from *Eucalyptus globulus* biomass using hydrophobic deep eutectic solvents

Nuno H. C. S. Silva, Eduarda S. Morais, Carmen S. R. Freire, Mara G. Freire and Armando J. D. Silvestre\*

CICECO-Aveiro Institute of Materials, Chemistry Department, University of Aveiro, Campus Universitário de Santiago, 3810-193 Aveiro, Portugal

\* Correspondence: [armsil@ua.pt](mailto:armsil@ua.pt)

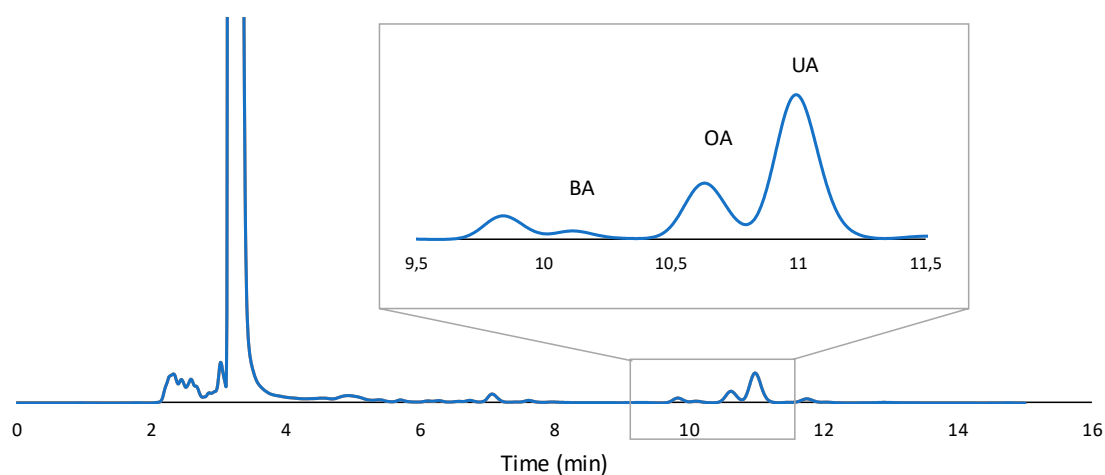

**Figure S1.** Illustrative HPLC chromatogram corresponding to the extraction using the NADES menthol:thymol at a molar ratio of 1:2 at 90°C (0.15 S/L ratio).
